# Supplementary material for: Observations and simulations of the seasonal evolution of snowpack cold content and its relation to snowmelt and the snowpack energy budget
Source: Copernicus journal article supplement (doi:10.5194/tc-12-1595-2018), 2018-05-03
Supplement: Supplementary file 1 [file tc-12-1595-2018-supplement.pdf]

Supplement of The Cryosphere, 12, 1595–1614, 2018  
<https://doi.org/10.5194/tc-12-1595-2018-supplement>  
© Author(s) 2018. This work is distributed under  
the Creative Commons Attribution 4.0 License.

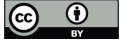

*Supplement of*

## **Observations and simulations of the seasonal evolution of snowpack cold content and its relation to snowmelt and the snowpack energy budget**

**K. S. Jennings et al.**

*Correspondence to:* Keith S. Jennings ([keith.jennings@colorado.edu](mailto:keith.jennings@colorado.edu))

The copyright of individual parts of the supplement might differ from the CC BY 4.0 License.

**Table S1. Information on the time range and number of snow pit observations per water year at the alpine and subalpine sites in the Niwot Ridge LTER.**

| <b>Site</b> | <b>Water year</b> | <b>Start</b> | <b>End</b> | <b>Total</b> |
|-------------|-------------------|--------------|------------|--------------|
| Alpine      | 1995              | 1995-01-24   | 1995-07-05 | 21           |
|             | 1996              | 1996-01-19   | 1996-06-21 | 20           |
|             | 1997              | 1997-01-24   | 1997-06-30 | 20           |
|             | 1998              | 1998-01-20   | 1998-06-22 | 18           |
|             | 1999              | 1999-01-20   | 1999-06-22 | 15           |
|             | 2000              | 2000-01-14   | 2000-06-06 | 17           |
|             | 2001              | 2001-01-16   | 2001-06-05 | 15           |
|             | 2002              | 2001-12-10   | 2002-03-25 | 10           |
|             | 2003              | 2002-11-13   | 2003-06-18 | 15           |
|             | 2004              | 2003-12-12   | 2004-06-07 | 18           |
|             | 2005              | 2005-02-01   | 2005-06-21 | 12           |
|             | 2006              | 2006-01-24   | 2006-06-06 | 11           |
|             | 2007              | 2007-02-09   | 2007-05-10 | 4            |
|             | 2008              | 2008-02-22   | 2008-06-17 | 7            |
|             | 2009              | 2008-12-31   | 2009-06-25 | 18           |
|             | 2010              | 2010-01-11   | 2010-06-09 | 21           |
| 2011        | 2010-12-07        | 2011-07-06   | 21         |              |
| 2012        | 2012-01-24        | 2012-05-23   | 16         |              |
| 2013        | 2013-01-03        | 2013-06-10   | 13         |              |
| Subalpine   | 2007              | 2007-02-07   | 2007-05-23 | 15           |
|             | 2008              | 2007-12-20   | 2008-05-27 | 18           |
|             | 2009              | 2008-12-22   | 2009-05-07 | 17           |
|             | 2010              | 2009-10-28   | 2010-06-02 | 25           |
|             | 2011              | 2010-12-15   | 2011-06-21 | 28           |
|             | 2012              | 2011-11-15   | 2012-04-25 | 21           |
|             | 2013              | 2012-12-13   | 2013-05-29 | 23           |

Table S2. Calibrated SNOWPACK canopy module parameters for the subalpine site.

|                 | LAI | Vegetation height (m) | Canopy direct throughfall | Wind scaling factor |
|-----------------|-----|-----------------------|---------------------------|---------------------|
| Parameter value | 3.7 | 7.3                   | 0.25                      | 0.44                |

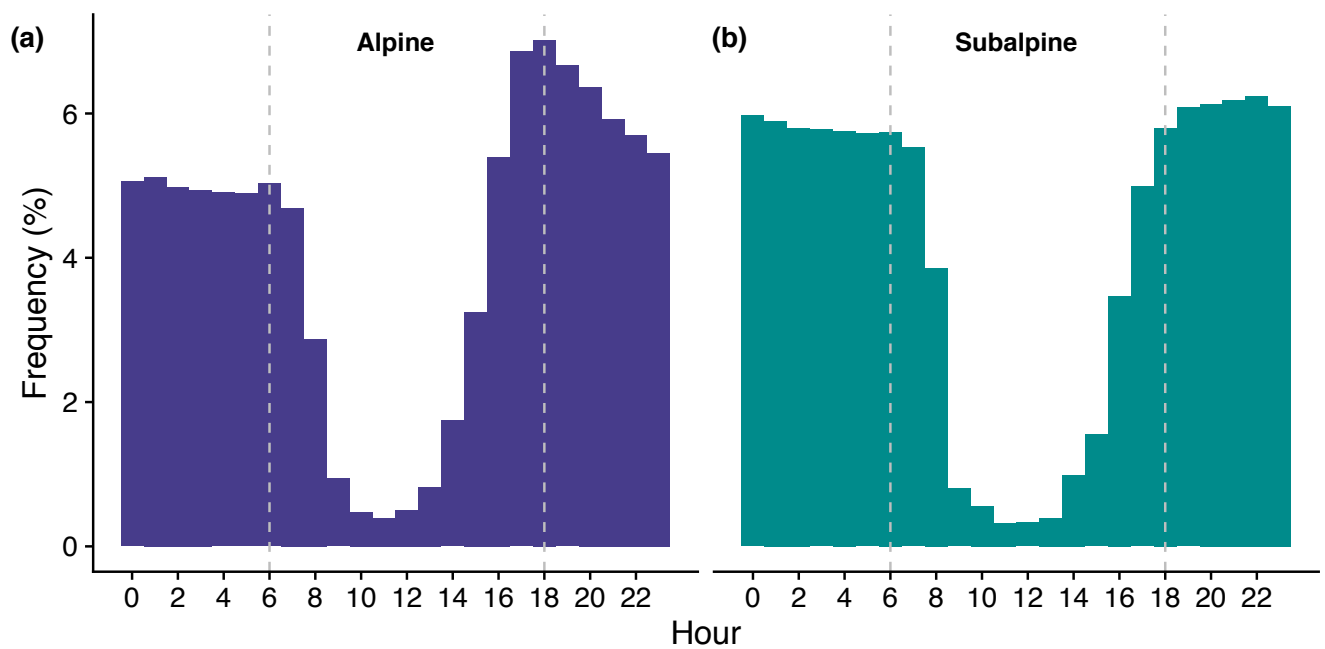

Figure S1. Histograms showing the timing of simulated cold content gains without snowfall in the alpine (a) and subalpine (b). The vertical dashed lines demarcate day (0600–1800 h) and night (1900–0500 h) at the two sites. Cold content gains occurred primarily at night, while daytime gains were concentrated in the early morning and evening hours. Less than 5.0% of simulated cold content gains occurred between 0900 and 1400 h at both sites.
